# Supplementary material for: T2-weighted short-tau-inversion-recovery imaging reflects disease activity of cardiac sarcoidosis
Source: HighWire-hosted journal article supplement (doi:10.1136/openhrt-2021-001728), 2021-09-01
Supplement: openhrt-2021-001728supp001_data_supplement.pdf [file openhrt-2021-001728supp001_data_supplement.pdf]

## 1 **Supplemental material**

2

### 3 **Preliminary investigation to set a cut-off value of the MSR on T2W-STIR-BB images**

#### 4 **Methods:**

5           Firstly, we conducted a preliminary investigation to determine a normal value of MSR. Of the  
6 patients who underwent CMR at Hospital A between January 1, 2013 and August 31, 2016, those who  
7 demonstrated an LVEF above 60%, no abnormal findings in LGE, and no morphological or ventricular  
8 wall motion abnormalities were examined. Of these, we identified those who were clinically  
9 diagnosed with myocardial diseases that have been reported to show diffuse high signal intensity on  
10 T2W-STIR-BB images, which were, cardiac amyloidosis, myocarditis, hypertrophic cardiomyopathy,  
11 or Takotsubo cardiomyopathy. The rest of the patients were recruited as controls. MSR of the disease  
12 group and the control group were compared. The cut-off value of the MSR was defined according to  
13 the mean plus 2 standard deviations of the MSR of the control cases. The diagnostic performance of  
14 MSR for identifying myocardial diseases that show diffuse high signal intensity on T2W-STIR-BB  
15 images was examined.

16

#### 17 **Results of preliminary investigation to set a cut-off value of MSR**

18           Of the 376 patients who underwent CMR between January 1, 2013 and August 31, 2016,  
19 33 patients demonstrated an LVEF of 60% or higher, no abnormal LGE, and no morphological or  
20 ventricular wall motion abnormalities. Of these, 11 patients (age  $67.9 \pm 12.7$ , 5 males) were clinically  
21 diagnosed with myocardial diseases that have been reported to show diffuse high signal intensity on  
22 T2W-STIR-BB images, which were, hypertrophic cardiomyopathy (6 patients), Takotsubo  
23 cardiomyopathy (3 patients), hyper-eosinophilic myocarditis (1 patient), and cardiac amyloidosis (1  
24 patient). The other 22 patients (age  $62.9 \pm 15.9$  years, 7 males) were recruited as controls. MSR values  
25 showed significant differences between the disease and control group; those of the disease group were  
26 significantly higher than those of the control ( $0.69 \pm 0.10$  vs.  $0.48 \pm 0.05$ ,  $P < .001$ ) (Supplemental

27 Figure). The cut-off value of the MSR was set at 0.58 according to the mean plus 2 standard deviation  
28 of the MSR of control cases. The sensitivity, specificity, accuracy, and positive and negative predictive  
29 values of diagnosing myocardial diseases were 90.9%, 100.0%, 97.0%, 100.0%, and 95.7%,  
30 respectively. With confirmation of the high diagnostic performance of MSR, a cut-off value of MSR of  
31 0.580 was used for evaluation of the localized hyperintensity on T2W-STIR-BB images of our CS  
32 cohort.
