# Supplementary figures and images for: T2-weighted short-tau-inversion-recovery imaging reflects disease activity of cardiac sarcoidosis
Source: HighWire-hosted journal article supplement (doi:10.1136/openhrt-2021-001728), 2021-09-01

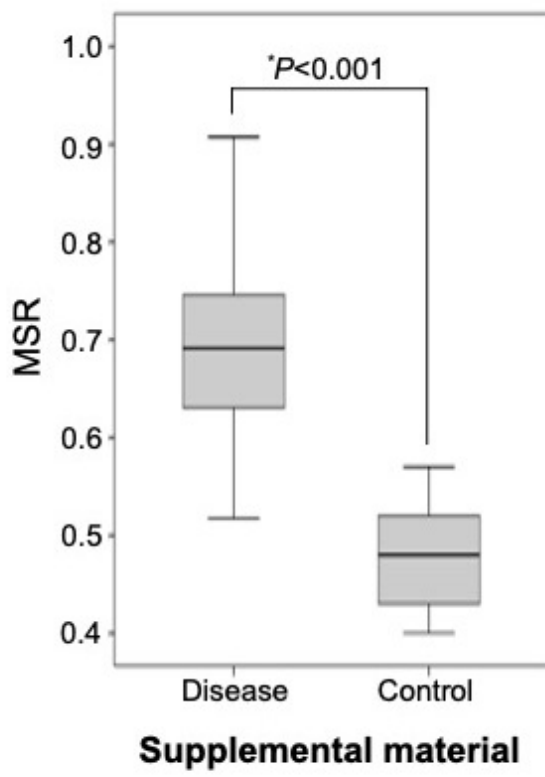

Supplement: openhrt-2021-001728supp002_data_supplement.pdf [file openhrt-2021-001728supp002_data_supplement.pdf]
